# Supplementary material for: Comprehensive Identification of PTI Suppressors in Type III Effector Repertoire Reveals that Ralstonia solanacearum Activates Jasmonate Signaling at Two Different Steps
Source: MDPI journal article supplement (doi:10.3390/ijms20235992), 2019-11-28
Supplement: s1 [file s1]

**TABLE S1** Bacterial and yeast strains used in this study.

| Strain                                        | Relevant genotype                                                                                                                                                                                                             | Reference  |
|-----------------------------------------------|-------------------------------------------------------------------------------------------------------------------------------------------------------------------------------------------------------------------------------|------------|
| <i>Escherichia coli</i>                       |                                                                                                                                                                                                                               |            |
| S17-1                                         | <i>E. coli</i> K12 <i>thi pro hsdR<sup>-</sup> hsdM<sup>+</sup> recA</i> [chr::RP4-2-Tc::Mu-Km::Tn7]                                                                                                                          | [1]        |
| <i>Saccharomyces cerevisiae</i>               |                                                                                                                                                                                                                               |            |
| Y2HGold                                       | <i>MATa, trp1-901, leu2-3, 112, ura3-52, his3-200, gal4Δ, gal80Δ, LYS2::GAL1<sub>UAS</sub>-Gal1<sub>TATA</sub>-His3, GAL2<sub>UAS</sub>-Gal2<sub>TATA</sub>-Ade2 URA3::MEL1<sub>UAS</sub>-Mell<sub>TATA</sub> AUR1-C MEL1</i> | Clontech   |
| Y187                                          | <i>MATa, ura3-52, his3-200, ade2-101, trp1-901, leu2-3, 112, gal4Δ, gal80Δ, met<sup>-</sup>, URA3::GAL1<sub>UAS</sub>-Gal1<sub>TATA</sub>-LacZ, MEL1</i>                                                                      | [2]        |
| <i>Ralstonia solanacearum</i>                 |                                                                                                                                                                                                                               |            |
| RS1002                                        | RS1000 Nal <sup>r</sup> (phylogroup I, biovar 4)                                                                                                                                                                              | [3]        |
| RS1704                                        | RS1002 $\Delta$ ripAW $\Delta$ ripAR                                                                                                                                                                                          | [4]        |
| RS1720                                        | RS1002 $\Delta$ ripE1                                                                                                                                                                                                         | This study |
| RS1725                                        | RS1002 $\Delta$ ripAR $\Delta$ ripAW $\Delta$ ripAY                                                                                                                                                                           | This study |
| RS1726                                        | RS1002 $\Delta$ ripAL $\Delta$ ripAR $\Delta$ ripAW $\Delta$ ripAY                                                                                                                                                            | This study |
| RS1727                                        | RS1002 $\Delta$ ripE1 $\Delta$ ripAL $\Delta$ ripAR $\Delta$ ripAW $\Delta$ ripAY                                                                                                                                             | This study |
| RS1728                                        | RS1002 $\Delta$ ripE1 $\Delta$ ripAC $\Delta$ ripAL $\Delta$ ripAR $\Delta$ ripAW $\Delta$ ripAY                                                                                                                              | This study |
| RS1729                                        | RS1002 $\Delta$ ripE1 $\Delta$ ripAC $\Delta$ ripAL $\Delta$ ripAP $\Delta$ ripAR $\Delta$ ripAW $\Delta$ ripAY                                                                                                               | This study |
| RS1730                                        | RS1002 $\Delta$ ripE1 $\Delta$ ripAC $\Delta$ ripAL $\Delta$ ripAP $\Delta$ ripAR $\Delta$ ripAU $\Delta$ ripAW $\Delta$ ripAY                                                                                                | This study |
| RS1731                                        | RS1002 $\Delta$ ripE1 $\Delta$ ripQ $\Delta$ ripAC $\Delta$ ripAL $\Delta$ ripAP $\Delta$ ripAR $\Delta$ ripAU $\Delta$ ripAW $\Delta$ ripAY                                                                                  | This study |
| RS1732                                        | RS1002 $\Delta$ ripA5 $\Delta$ ripE1 $\Delta$ ripQ $\Delta$ ripAC $\Delta$ ripAL $\Delta$ ripAP $\Delta$ ripAR $\Delta$ ripAU $\Delta$ ripAW $\Delta$ ripAY                                                                   | This study |
| RS1733                                        | RS1002 $\Delta$ ripA5 $\Delta$ ripE1 $\Delta$ ripI $\Delta$ ripQ $\Delta$ ripAC $\Delta$ ripAL $\Delta$ ripAP $\Delta$ ripAR $\Delta$ ripAU $\Delta$ ripAW $\Delta$ ripAY                                                     | This study |
| <i>Pseudomonas syringae</i> pv. <i>tomato</i> |                                                                                                                                                                                                                               |            |
| DC3000                                        | Rif <sup>r</sup> COR <sup>+</sup>                                                                                                                                                                                             | [5]        |
| DC3000 <i>cor<sup>-</sup></i>                 | DC3000 $\Delta$ cmxA $\Delta$ cfa6 (Rif <sup>r</sup> COR <sup>-</sup> )                                                                                                                                                       | [6]        |
| <i>Agrobacterium tumefaciens</i>              |                                                                                                                                                                                                                               |            |
| GV3101                                        | Gm <sup>r</sup> Rif <sup>r</sup>                                                                                                                                                                                              | [7]        |

### Supplementary References

1. Simon, R.; Priefer, U.; Pühler, A. A broad host range mobilization system for *in vivo* genetic engineering: Transposon mutagenesis in Gram-negative bacteria. *Nature Biotechnology*. 1983, *1*, 784–791.
2. Harper, J.W.; Adami, G.R.; Wei, N.; Keyomarsi, K.; Elledge, S.J. The p21 Cdk-interacting protein Cip1 is a potent inhibitor of G1 cyclin-dependent kinases. *Cell*. 1993, *75*(4), 805–816.
3. Mukaihara, T.; Tamura, N.; Murata, Y.; Iwabuchi, M. Genetic screening of Hrp type III-related pathogenicity genes controlled by the HrpB transcriptional activator in *Ralstonia solanacearum*. *Mol Microbiol*. 2004, *54*(4), 863–875.
4. Nakano, M.; Oda, K.; Mukaihara, T. *Ralstonia solanacearum* novel E3 ubiquitin ligase (NEL) effectors RipAW and RipAR suppress pattern-triggered immunity in plants. *Microbiology (Reading, UK)*. 2017, *163*(7), 992–1002.
5. Cuppels, D.A. Generation and characterization of Tn5 insertion mutations in *Pseudomonas syringae* pv. *tomato*. *Appl Environ Microbiol*. 1986, *51*(2), 323–327.
6. Nakano, M.; Mukaihara, T. *Ralstonia solanacearum* type III effector RipAL targets chloroplasts and induces jasmonic acid production to suppress salicylic acid-mediated defense responses in plants. *Plant Cell Physiol*. 2018, *59*(12), 2576–2589.
7. Lamblin, F.; Saladin, G.; Dehorter, B.; Cronier, D.; Grenier, E.; Lacoux, J.; Bruyant, P.; Lainé, E.; Chabbert, B.; Girault, F.; Monties, B.; Morvan, C.; David, H.; David, A. Overexpression of a heterologous sam gene encoding S-adenosylmethionine synthetase in flax (*Linum usitatissimum*) cells: Consequences on methylation of lignin precursors and pectins. *Physiol Plant*. 2001, *112*(2), 223–232.
