# Supplementary material for: Comprehensive Identification of PTI Suppressors in Type III Effector Repertoire Reveals that Ralstonia solanacearum Activates Jasmonate Signaling at Two Different Steps
Source: MDPI journal article supplement (doi:10.3390/ijms20235992), 2019-11-28
Supplement: s1 [file s1]

**TABLE S3** Primer sets used for real-time PCR analysis.

| Target gene                     | Purpose | Sequence (5'-3')                                     | Reference |
|---------------------------------|---------|------------------------------------------------------|-----------|
| <i>NbCyp71D20</i>               | qRT-PCR | TCATGGCGACCACTGGAGACAAAT<br>TGATGGAGCTGAAGGACCGAACAT | [1]       |
| <i>NbAcre31</i>                 | qRT-PCR | GAGAAACTGGGATTGCCTGAAGGA<br>AATTCGGCCATCGTGATCTTGGTC | [2]       |
| <i>NbGras2</i>                  | qRT-PCR | TCATGAGGCGTTACTCGGAGCATT<br>TACCTAGCACCAAGCAGATGCAGA | [2]       |
| <i>NbWrky22</i>                 | qRT-PCR | CAAGGCATAAAGCAGACACAACA<br>GCTTCTGACCACCGCATGT       | [1]       |
| <i>NbAOS</i>                    | qRT-PCR | TCCGTTAGACACCAATCTTGGA<br>AGGCCTAAAATTAGCAAAGGATGA   | [3]       |
| <i>NbPR4</i>                    | qRT-PCR | GGCCAAGATTCTGTGGTAGAT<br>CACTGTTGTTTGAGTTCCTGTTCT    | [4]       |
| <i>NbICS1</i>                   | qRT-PCR | GTGTCGGCTCTGCTGTCTTCT<br>CTGCGTATAGCACGCCAATC        | [5]       |
| <i>NbEF1<math>\alpha</math></i> | qRT-PCR | CCCAAGAGGCCCTCAGACA<br>CACACGACCAACAGGGACAGT         | [1]       |
| <i>NbNQO</i>                    | qRT-PCR | AAGGCGGTGGTCAAGAAA<br>CAAACATACCAGCACCGAATG          | [6]       |
| <i>NbF-box</i>                  | qRT-PCR | GGCACTCACAAACGTCTATTTC<br>ACCTGGGAGGCATCCTGCTTAT     | [7]       |

**Supplementary References**

- Heese, A.; Hann, D.R.; Gimenez-Ibanez, S.; Jones, A.M.; He, K.; Li, J.; Schroeder, J.I.; Peck, S.C.; Rathjen, J.P. The receptor-like kinase SERK3/BAK1 is a central regulator of innate immunity in plants. *Proc Natl Acad Sci U S A*. 2007, *104*(29), 12217–12222.
- Nguyen, H.P.; Chakravarthy, S.; Velasquez, A.C.; McLane, H.L.; Zeng, L.; Nakayashiki, H.; Park, D.H.; Collmer, A.; Martin, G.B. Methods to study PAMP-triggered immunity using tomato and *Nicotiana benthamiana*. *Mol Plant Microbe Interact*. 2010, *23*(8), 991–999.
- Chung, H.S.; Koo, A.J.; Gao, X.; Jayanty, S.; Thines, B.; Jones, A.D.; Howe, G.A. Regulation and function of Arabidopsis *JASMONATE ZIM*-domain genes in response to wounding and herbivory. *Plant Physiol*. 2008, *146*(3), 952–64.
- Maimbo, M.; Ohnishi, K.; Hikichi, Y.; Yoshioka, H.; Kiba, A. Induction of a small heat shock protein and its functional roles in *Nicotiana* plants in the defense response against *Ralstonia solanacearum*. *Plant Physiol*. 2007, *145*(4), 1588–1599.
- Nakano, M.; Mukaihara, T. *Ralstonia solanacearum* type III effector RipAL targets chloroplasts and induces jasmonic acid production to suppress salicylic acid-mediated defense responses in plants. *Plant Cell Physiol*. 2018, *59*(12), 2576–2589.
- Pombo, M.A.; Ramos, R.N.; Zheng, Y.; Fei, Z.; Martin, G.B.; Rosli, H.G. Transcriptome-based identification and validation of reference genes for plant-bacteria interaction studies using *Nicotiana benthamiana*. *Sci Rep*. 2019, *9*(1), 1632.
- Liu, D.; Shi, L.; Han, C.; Yu, J.; Li, D.; Zhang, Y. Validation of reference genes for gene expression studies in virus-infected *Nicotiana benthamiana* using quantitative real-time PCR. *PLoS One*. 2012, *7*(9), e46451.
