# Supplementary material for: Comprehensive Identification of PTI Suppressors in Type III Effector Repertoire Reveals that Ralstonia solanacearum Activates Jasmonate Signaling at Two Different Steps
Source: MDPI journal article supplement (doi:10.3390/ijms20235992), 2019-11-28
Supplement: s1 [file s1]

**TABLE S2** Primer sets used for vector construction.

| Target gene                                                                  | Purpose                         | Sequence (5'-3')                                                                   |
|------------------------------------------------------------------------------|---------------------------------|------------------------------------------------------------------------------------|
| <i>ripE1</i>                                                                 | Cloning                         | GCAGGCTCCACCATGCCGCCCCTCCTGCCGTCGAT<br>AAGCTGGGTCTAGATAGCTTTCCGTGGCGGGCGGC         |
| <i>ripE1</i> <sup>C172A</sup>                                                | Mutagenesis                     | GTGGCAGGGGCGGGGAACGCCGGCGAACACGCCGATCTG<br>CAGATCGGCGTGTTCCGCCGGCGTTCCCCGCCCTGCCAC |
| <i>ripE1</i> <sup>H203A</sup>                                                | Mutagenesis                     | CATATCGACGACTTCGACGCCTTCTGGGCAATCGTGCAC<br>GTGCACGATTGCCCAGAAGGCGTCGAAGTCGTCGATATG |
| <i>ripE1</i> / <i>ripE1</i> <sup>C172A</sup> / <i>ripE1</i> <sup>H203A</sup> | Localization / Transgenic plant | GCCTACTAGTGGATCCATGCCGCCCCTCCTGCCGTC<br>CGAGGTCGACGGATCCTCAGCTTTCCGTGGCGGGCGG      |
| <i>ripE1</i> / <i>ripE1</i> <sup>C172A</sup> / <i>ripE1</i> <sup>H203A</sup> | Yeast two-hybrid                | CATGGAGGCCGAATTCATGCCGCCCCTCCTGCCGTC<br>GCAGGTCGACGGATCCTCAGCTTTCCGTGGCGGGCGG      |
| <i>JAZ4</i>                                                                  | Cloning                         | GCAGGCTCCACCATGGAGAGAGATTTTCTC<br>AAGCTGGGTCTAGATAGTGCAGATGATGAG                   |
| <i>JAZ9</i>                                                                  | Cloning                         | GCAGGCTCCACCATGGAAAGAGATTTTCTG<br>AAGCTGGGTCTAGATATGTAGGAGAAGTAG                   |
| <i>JAZ10</i>                                                                 | Cloning                         | GCAGGCTCCACCATGTCGAAAGCTACCATA<br>AAGCTGGGTCTAGATAGGCCGATGTCGGAT                   |
| <i>ripA5</i> upstream                                                        | Deletion mutant                 | CGACTCTAGAGGATCCGATACATGGACCGCATCCG<br>GCGTTTGCTGCATCGGCTCCGGTGCACGCGCGTCG         |
| <i>ripA5</i> downstream                                                      | Deletion mutant                 | CGCGTGCACCGGAGCCGATGCAGCAAACGCGCCCCG<br>CGGTACCCGGGGATCATCCGGGTGCTGGGGTGCCT        |
| <i>ripE1</i> upstream                                                        | Deletion mutant                 | CGACTCTAGAGGATCCGACGATGTCCCAGACCCTC<br>GAGCGCGGACGACCGGGCAGGCGGCTCAGTGTGGG         |
| <i>ripE1</i> downstream                                                      | Deletion mutant                 | ACTGAGCCGCCTGCCCGGTCGTCCGCGCTCAGCTC<br>CGGTACCCGGGGATCCAGCTCGGAGATCCAGGTGC         |
| <i>ripI</i> upstream                                                         | Deletion mutant                 | CGACTCTAGAGGATCCTGACCGGCTATGCCAGCATC<br>CGGCCTTTCAGGTCGCCGTACACCTATGTCATATTCCG     |
| <i>ripI</i> downstream                                                       | Deletion mutant                 | GACATAGGTGTACGGCGACCTGAAAGGCCGGCCTG<br>CGGTACCCGGGGATCCCTACCAAGCAGTACCAGG          |
| <i>ripQ</i> upstream                                                         | Deletion mutant                 | CGACTCTAGAGGATCCTCCAAGGGGCAGGAGTGGA<br>CGCCGGCTTTGCGCGGATTCCGATTCCGTTTGCGG         |
| <i>ripQ</i> downstream                                                       | Deletion mutant                 | AACGGAATCCGAATCCGCGCAAAGCCGGCGAGCAG<br>CGGTACCCGGGGATCTGGCAGCCAAGCCGCTGGGC         |
| <i>ripAC</i> upstream                                                        | Deletion mutant                 | CCCAAGCTTACGCAGCCGATGTAATGGCG<br>GCTCTAGACCGAACGATCAGTCGTCGTC                      |

|                         |                 |                                                                             |
|-------------------------|-----------------|-----------------------------------------------------------------------------|
| <i>ripAC</i> downstream | Deletion mutant | CGGGATCCTCCGGTGCCGCATCCCCGCC<br>GGAATTCGCTACCTGATGGCGCGCAT                  |
| <i>ripAL</i> upstream   | Deletion mutant | GGAAGCTTTTCCCGATGCCGCAGCGTTC<br>GGGGATCCGGGGCGGTCAAAGCAGCATCGG              |
| <i>ripAL</i> downstream | Deletion mutant | GGGGATCCGTCGCAGGTGGCAGGCCAACGG<br>GGGAATTCGGATTGGGGATTGAGGACGAC             |
| <i>ripAP</i> upstream   | Deletion mutant | CGACTCTAGAGGATCCGCGGGCGTGCTCCTTGGCC<br>CAGCGAGCCCGACGGGATGACGCGACGGTGCTGGG  |
| <i>ripAP</i> downstream | Deletion mutant | CACCGTCGCGTCATCCCGTCGGGCTCGCTGTTGCG<br>CGGTACCCGGGGATCCTGGCCGCCTCCACCAGCTTG |
| <i>ripAU</i> upstream   | Deletion mutant | CGACTCTAGAGGATCTGGATCGACGACACTGTATC<br>CAACCGGCGTGCCCGGGAAACGTGTGGGGTTGCA   |
| <i>ripAU</i> downstream | Deletion mutant | CCCCACACGTTTCCGCGGGCACGCCGGTTGACGCG<br>CGGTACCCGGGGATCGGTACAGCGCCTCGTACGCG  |
| <i>ripAY</i> upstream   | Deletion mutant | GGGAATTCGGCCCGCCATGCGG<br>GGGGATCCGGCTGGCACCGTCGATCGGGA                     |
| <i>ripAY</i> downstream | Deletion mutant | GGGGATCCCGCCACTCGCCATTCTCTCGC<br>GGAAGCTTAGCCGATGCCGATAATGTCC               |

---
