# Supplementary material for: Comprehensive Identification of PTI Suppressors in Type III Effector Repertoire Reveals that Ralstonia solanacearum Activates Jasmonate Signaling at Two Different Steps
Source: Int J Mol Sci. 2019 Nov 28;20(23):5992. doi: 10.3390/ijms20235992 (PMC6928842; doi:10.3390/ijms20235992)
Supplement: Supplementary file 1 [file ijms-20-05992-s001.zip]

Archive with 4 entries (4 files):
- Supplemental Materials/Supplemental Figures.pdf
- Supplemental Materials/Table_S1.pdf
- Supplemental Materials/Table_S2.pdf
- Supplemental Materials/Table_S3.pdf
